# Supplementary material for: Demand Heterogeneity in IT Infrastructure Services: Modeling and Evaluation of a Dynamic Approach to Defining Service Levels
Source: Atypon-hosted journal article supplement (doi:10.1287/isre.1080.0196), 2009-02-27
Supplement: isre.1080.0196-sm-sen_et_al.pdf [file isre.1080.0196-sm-sen_et_al.pdf]

## Supplementary Material

### Section A: Waiting Time Approximation for Multiple Services

For the single service scenario, the waiting times are derived according to equation 9. Since such expression is analytically intractable for the multiple-service setting, we use a proportionate value of the number of resources used by each service. That is, if  $n$  is the total number of resources, the resource requirement for service type  $j$  is given by  $n_j = \frac{\lambda_j}{\sum_r \lambda_r} n$ . This proportional value represents the share of the total number of resources dedicated to a particular service. We use this value of  $n_j$  in the waiting time expression for each service separately using the expression derived for the single service setting.

### Section B: Setting Parameters for the Simulation Experiments

#### Delay costs

We have used a truncated normal distribution (so that only users with positive delay-cost/time are generated) to represent the various user populations. A normal distribution is used in accordance with previous literature (Konana, et al. 2000), also since users gain nothing from waiting for their requests to be served, it can have only positive values. We assume the medium-delay cost population in the organization is closely aligned with the prices used in the fixed-price scheme, while the high (low)-delay cost population have a higher (lower) valuation for the services. For example, for Service A with an estimate of 12.0/hr arrivals, this scheme is equivalent to charging \$20 for each request. The medium-delay cost user's delay cost will be slightly lower than this value (On average, the users in this population value the service at \$20/hr, the valuation for a service must be greater than their delay costs in order for them to enter the system and gain a positive utility (Konana, et al. 2000) ). We assume this average delay cost to be 75% of the valuation, and this is assigned to the user profile with medium delay costs. The low-(high) delay cost users are assumed to have delay cost of 50% (125%) of the

valuation (\$20 in this case). The standard deviation in each population is kept at 25% of the mean.

This way, we have three distinct user populations, with minimal amount of overlap between them.

The multiple service setting employs the same technique for each service separately. We also have tested other combinations of delay cost distributions and find the results to be robust to a range of values of delay cost. If delay cost distributions are very close to each other, the requests converge to a single priority queue – substantive differences in delay costs are necessary for the results to hold. For the results reported in this study, the parameters for the user delay-cost distributions for the three services are as follows:

| Customer Profile |           | Low Delay-cost | Medium Delay-cost | High Delay-cost |
|------------------|-----------|----------------|-------------------|-----------------|
| Delay-Cost/Hr    | Service A | 10,2,5         | 15,3,75           | 25,6,25         |
|                  | Service B | 20,5           | 30,7,5            | 50,13           |
|                  | Service C | 80,20          | 120,30            | 200,50          |

#### Penalties

Expression 8 provides the basis of translating the fixed-prices into a dynamic price-penalty scheme. In our simulations, we used three priority classes. The penalty thus obtained, is assigned to the penalty of priority class 2, the implication being that users coming in this class obtain the same service level as in the fixed-price scheme. Since each higher priority class imposes a penalty-cost on all lower priority class requests, the difference among the penalties in these classes should not be the same, rather the difference between penalties in priority class 1 and 2 should be greater than the difference between priority classes 2 and 3. Our initial runs do confirm this conjecture. Based on this rationale and initial findings, we make the penalties in priority class 1 (3) 50% more (less) than that of priority 2.

In the multiple service scenario note that the penalties in each priority class is the same for this particular setting. This is so because the ratio of the estimated arrival rate to service rate is same (=2) for each service. If another setting was used, the penalty values would change depending on the relative value of this ratio.

**Section C: Arrival Rates**

Single Service Setting

Arrival Pattern: *Stationary*

| Customer Profile   | Low Delay-cost | Medium Delay-cost | High Delay-cost |
|--------------------|----------------|-------------------|-----------------|
| Arrival Rate (/hr) | 3              | 6                 | 3               |

Arrival Pattern: *Non-stationary*; Utilization Rate  $\approx$  75%

| Delay Cost Distribution |         | Low Delay-cost | Medium Delay-cost | High Delay-cost |
|-------------------------|---------|----------------|-------------------|-----------------|
| Arrival Rate (/hr)      | Month 1 | 3              | 6                 | 3               |
|                         | Month 2 | 3.439705564    | 6.879411129       | 3.439705564     |
|                         | Month 3 | 2.641586385    | 5.28317277        | 2.641586385     |
|                         | Month 4 | 3.424882055    | 6.84976411        | 3.424882055     |
|                         | Month 5 | 3.555924507    | 7.111849014       | 3.555924507     |
|                         | Month 6 | 2.30767455     | 4.6153491         | 2.30767455      |

Arrival Pattern: *Non-stationary*; Utilization Rate  $\approx$  80%

| Customer Profile   | Low Delay-cost | Medium Delay-cost | High Delay-cost |
|--------------------|----------------|-------------------|-----------------|
| Arrival Rate (/hr) | 3.083680648    | 6.167361296       | 3.083680648     |
| Month 2            | 3.59383948     | 7.187678959       | 3.59383948      |
| Month 3            | 3.58723706     | 7.175447413       | 3.58723706      |
| Month 4            | 2.924714407    | 5.849428815       | 2.924714407     |
| Month 5            | 3.01038906     | 6.020778119       | 3.01038906      |
| Month 6            | 2.921147896    | 5.842295792       | 2.921147896     |

Arrival Pattern: *Non-stationary*; Utilization Rate  $\approx$  85%

| Customer Profile   | Low Delay-cost | Medium Delay-cost | High Delay-cost |
|--------------------|----------------|-------------------|-----------------|
| Arrival Rate (/hr) | 3.63151        | 7.263019          | 3.63151         |
| Month 2            | 3.710258       | 7.420517          | 3.710258        |
| Month 3            | 3.10018        | 6.20036           | 3.10018         |
| Month 4            | 3.121483       | 6.242966          | 3.121483        |
| Month 5            | 3.538387       | 7.076775          | 3.538387        |
| Month 6            | 3.556418       | 7.112837          | 3.556418        |

Arrival Pattern: *Non-stationary*; Utilization Rate  $\approx$  90%

| Customer Profile   | Low Delay-cost | Medium Delay-cost | High Delay-cost |
|--------------------|----------------|-------------------|-----------------|
| Arrival Rate (/hr) | 3.750723       | 7.501445          | 3.750723        |
| Month 2            | 3.249004       | 6.498009          | 3.249004        |
| Month 3            | 3.124427       | 6.248855          | 3.124427        |
| Month 4            | 3.654246       | 7.308492          | 3.654246        |
| Month 5            | 3.803782       | 7.607563          | 3.803782        |
| Month 6            | 3.593391       | 7.186783          | 3.593391        |

Multiple Service Setting

Arrival Pattern: *Stationary*

| Customer Profile   |           | Low Delay-cost | Medium Delay-cost | High Delay-cost |
|--------------------|-----------|----------------|-------------------|-----------------|
| Arrival Rate (/hr) | Service A | 4              | 8                 | 4               |
|                    | Service B | 2              | 4                 | 2               |
|                    | Service C | 0.5            | 1                 | 0.5             |

Arrival Pattern: *Non-stationary*; Utilization Rate  $\approx 75\%$

| Delay Cost Distribution |            | Low Delay-cost | Medium Delay-cost | High Delay-cost |
|-------------------------|------------|----------------|-------------------|-----------------|
| Service A:              |            |                |                   |                 |
| Arrival Rate (/hr)      | Month 1    | 3.705932       | 7.411865          | 3.705932        |
|                         | Month 2    | 3.251463       | 6.502925          | 3.251463        |
|                         | Month 3    | 3.667351       | 7.334702          | 3.667351        |
|                         | Month 4    | 3.755288       | 7.510575          | 3.755288        |
|                         | Month 5    | 3.294362       | 6.588725          | 3.294362        |
|                         | Month 6    | 3.567109       | 7.134217          | 3.567109        |
|                         | Service B: |                |                   |                 |
| Arrival Rate (/hr)      | Month 1    | 1.97146        | 3.94292           | 1.97146         |
|                         | Month 2    | 1.569626       | 3.139252          | 1.569626        |
|                         | Month 3    | 1.985476       | 3.970952          | 1.985476        |
|                         | Month 4    | 1.63337        | 3.26674           | 1.63337         |
|                         | Month 5    | 1.938882       | 3.877763          | 1.938882        |
|                         | Month 6    | 1.849061       | 3.698121          | 1.849061        |
|                         | Service C: |                |                   |                 |
| Arrival Rate (/hr)      | Month 1    | 0.407641       | 0.815283          | 0.407641        |
|                         | Month 2    | 0.475846       | 0.951691          | 0.475846        |
|                         | Month 3    | 0.434244       | 0.868488          | 0.434244        |
|                         | Month 4    | 0.420983       | 0.841967          | 0.420983        |
|                         | Month 5    | 0.407246       | 0.814491          | 0.407246        |
|                         | Month 6    | 0.442365       | 0.884731          | 0.442365        |

Arrival Pattern: *Non-stationary*; Utilization Rate = 80%

| Delay Cost Distribution |            | Low Delay-cost | Medium Delay-cost | High Delay-cost |
|-------------------------|------------|----------------|-------------------|-----------------|
| Service A:              |            |                |                   |                 |
| Arrival Rate (/hr)      | Month 1    | 4              | 8                 | 4               |
|                         | Month 2    | 4.08777635     | 8.1755527         | 4.08777635      |
|                         | Month 3    | 3.614761241    | 7.229522482       | 3.614761241     |
|                         | Month 4    | 3.487500908    | 6.975001817       | 3.487500908     |
|                         | Month 5    | 3.865451605    | 7.73090321        | 3.865451605     |
|                         | Month 6    | 4.574339381    | 9.148678761       | 4.574339381     |
|                         | Service B: |                |                   |                 |
| Arrival Rate (/hr)      | Month 1    | 2              | 4                 | 2               |
|                         | Month 2    | 1.577478691    | 3.154957382       | 1.577478691     |
|                         | Month 3    | 1.850125256    | 3.700250512       | 1.850125256     |
|                         | Month 4    | 1.685801684    | 3.371603369       | 1.685801684     |
|                         | Month 5    | 1.864005882    | 3.728011764       | 1.864005882     |
|                         | Month 6    | 1.507430182    | 3.014860364       | 1.507430182     |
|                         | Service C: |                |                   |                 |
| Arrival Rate (/hr)      | Month 1    | 0.5            | 1                 | 0.5             |
|                         | Month 2    | 0.489027956    | 0.978055913       | 0.489027956     |
|                         | Month 3    | 0.545615595    | 1.09123119        | 0.545615595     |
|                         | Month 4    | 0.564824394    | 1.129648788       | 0.564824394     |
|                         | Month 5    | 0.503612719    | 1.007225438       | 0.503612719     |
|                         | Month 6    | 0.411254843    | 0.822509686       | 0.411254843     |

Arrival Pattern: *Non-stationary*; Utilization Rate = 85%

| Delay Cost Distribution |         | Low Delay-cost | Medium Delay-cost | High Delay-cost |
|-------------------------|---------|----------------|-------------------|-----------------|
| Service A:              |         |                |                   |                 |
| Arrival Rate (/hr)      | Month 1 | 4.063347781    | 8.126695561       | 4.063347781     |
|                         | Month 2 | 4.898065527    | 9.796131055       | 4.898065527     |
|                         | Month 3 | 3.781042505    | 7.562085011       | 3.781042505     |
|                         | Month 4 | 4.142380044    | 8.284760088       | 4.142380044     |
|                         | Month 5 | 4.149891968    | 8.299783936       | 4.149891968     |
|                         | Month 6 | 4.581821433    | 9.163642867       | 4.581821433     |
| Service B:              |         |                |                   |                 |
| Arrival Rate (/hr)      | Month 1 | 1.663841427    | 3.327682853       | 1.663841427     |
|                         | Month 2 | 1.504552633    | 3.009105266       | 1.504552633     |
|                         | Month 3 | 1.571899962    | 3.143799924       | 1.571899962     |
|                         | Month 4 | 1.751907494    | 3.503814988       | 1.751907494     |
|                         | Month 5 | 2.02110911     | 4.04221822        | 2.02110911      |
|                         | Month 6 | 2.001595764    | 4.003191528       | 2.001595764     |
| Service C:              |         |                |                   |                 |
| Arrival Rate (/hr)      | Month 1 | 0.507918473    | 1.015836945       | 0.507918473     |
|                         | Month 2 | 0.612258191    | 1.224516382       | 0.612258191     |
|                         | Month 3 | 0.472630313    | 0.945260626       | 0.472630313     |
|                         | Month 4 | 0.517797506    | 1.035595011       | 0.517797506     |
|                         | Month 5 | 0.518736496    | 1.037472992       | 0.518736496     |
|                         | Month 6 | 0.572727679    | 1.145455358       | 0.572727679     |

Arrival Pattern: *Non-stationary*; Utilization Rate = 90%

| Delay Cost Distribution |         | Low Delay-cost | Medium Delay-cost | High Delay-cost |
|-------------------------|---------|----------------|-------------------|-----------------|
| Service A:              |         |                |                   |                 |
| Arrival Rate (/hr)      | Month 1 | 3.969956       | 7.939913          | 3.969956        |
|                         | Month 2 | 3.724581       | 7.449162          | 3.724581        |
|                         | Month 3 | 3.668444       | 7.336888          | 3.668444        |
|                         | Month 4 | 4.22811        | 8.45622           | 4.22811         |
|                         | Month 5 | 3.659025       | 7.318051          | 3.659025        |
|                         | Month 6 | 4.68388        | 9.36776           | 4.68388         |
| Service B:              |         |                |                   |                 |
| Arrival Rate (/hr)      | Month 1 | 1.889619       | 3.779238          | 1.889619        |
|                         | Month 2 | 2.083885       | 4.16777           | 2.083885        |
|                         | Month 3 | 2.191929       | 4.383859          | 2.191929        |
|                         | Month 4 | 2.09303        | 4.18606           | 2.09303         |
|                         | Month 5 | 1.862091       | 3.724181          | 1.862091        |
|                         | Month 6 | 1.844991       | 3.689982          | 1.844991        |
| Service C:              |         |                |                   |                 |
| Arrival Rate (/hr)      | Month 1 | 0.506646       | 1.013291          | 0.506646        |
|                         | Month 2 | 0.583271       | 1.166542          | 0.583271        |
|                         | Month 3 | 0.592428       | 1.184855          | 0.592428        |
|                         | Month 4 | 0.574226       | 1.148452          | 0.574226        |
|                         | Month 5 | 0.593307       | 1.186614          | 0.593307        |
|                         | Month 6 | 0.598831       | 1.197661          | 0.598831        |

**Section C: Experimental Set Up:**

As described in section 4 we use a discrete event simulation package (Simprocess) with hierarchical process modeling capabilities in conjunction with a mathematical software (Maple) to conduct our experiments. Details of the simulation program as well as the price generator are provided below.

Simulation environment– Figure 4 shows a screen shot of the highest level of the service set up.

There are three ‘generate’ processes (one for each service), one ‘process calls’ process, and a ‘dispose calls’ process.

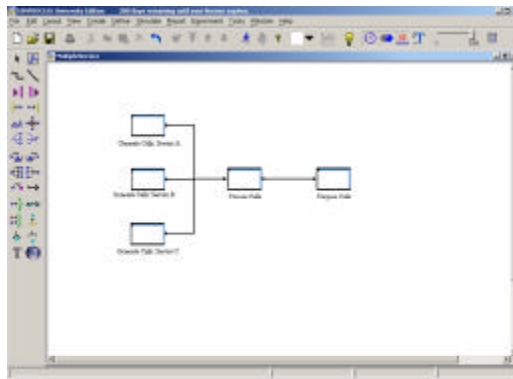

**Figure 4: Main Simulation Model**

Figure 5 shows the details of the 'generate calls' process for service A. Entities generated here are associated with two distributions. A random number from a Poisson distribution for the arrival rates, and a random number for the delay costs. Each generated entity is tagged so that individual delay costs, waiting time and welfare values could be captured programmatically.

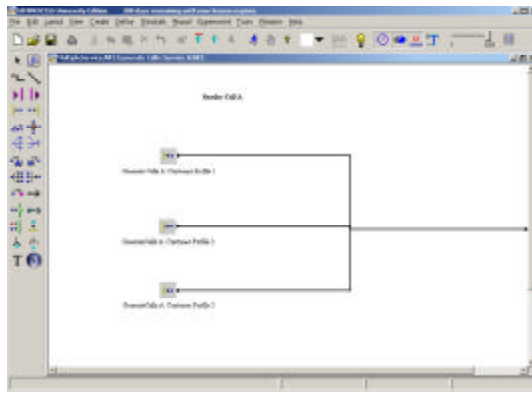

Figure 5. Details of the generate Calls (Service A) Process

Figure 6 shows the details of the process calls process. Here the branch activity implements code to separate service requests into priority classes. Since the entities are tagged, the waiting time spent for each individual service call is recorded at the 'process calls' activity. The waiting times are used in calculating individual welfare values for each user in the customer organization and the total welfare for the provider. The update welfare entity is set to be triggered every 7 days. This entity writes the past arrival rates into flat files and gets the price updates from the price generator module. Also, the sum of all welfare values for both the customer and provider are recorded and appended in output flat files. After writing, these values are refreshed every output period.

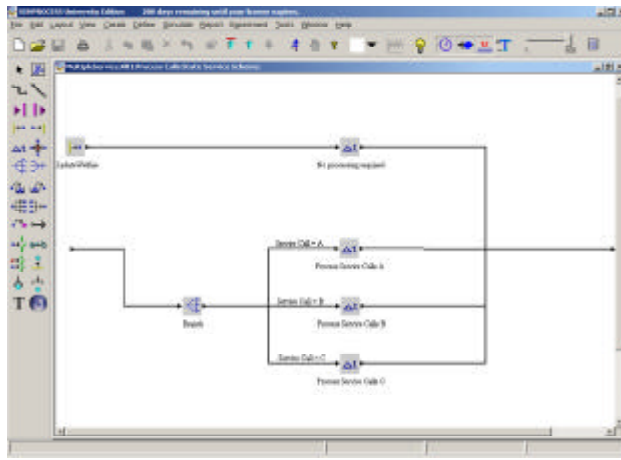

Figure 6: Details of 'Process Calls'

Price-Generator:

This is a mathematical program that runs synchronously with the simulation program to periodically update the prices. The simulation program outputs the number of resources and the arrival rates in the past interval into flat files. The Maple program reads these values and calculates the waiting times  $\bar{w}_k$ , their partial derivatives  $\bar{w}_{k,j}$ , and the subsequent prices ( $S_k$ ). Details of the price generation process are given in Appendix A.
